# Supplementary material for: Regulated IRE1α-dependent decay (RIDD)-mediated reprograming of lipid metabolism in cancer
Source: PubMed Central journal article supplement (PMC9076827; doi:10.1038/s41467-022-30159-0), 2022-05-06
Supplement: 41467_2022_30159_MOESM1_ESM.pdf [file 41467_2022_30159_MOESM1_ESM.pdf]

Supplementary Information

**Regulated IRE1 $\alpha$ -dependent decay (RIDD)-mediated reprogramming of lipid metabolism in cancer**

Almanza and Mnich *et al*

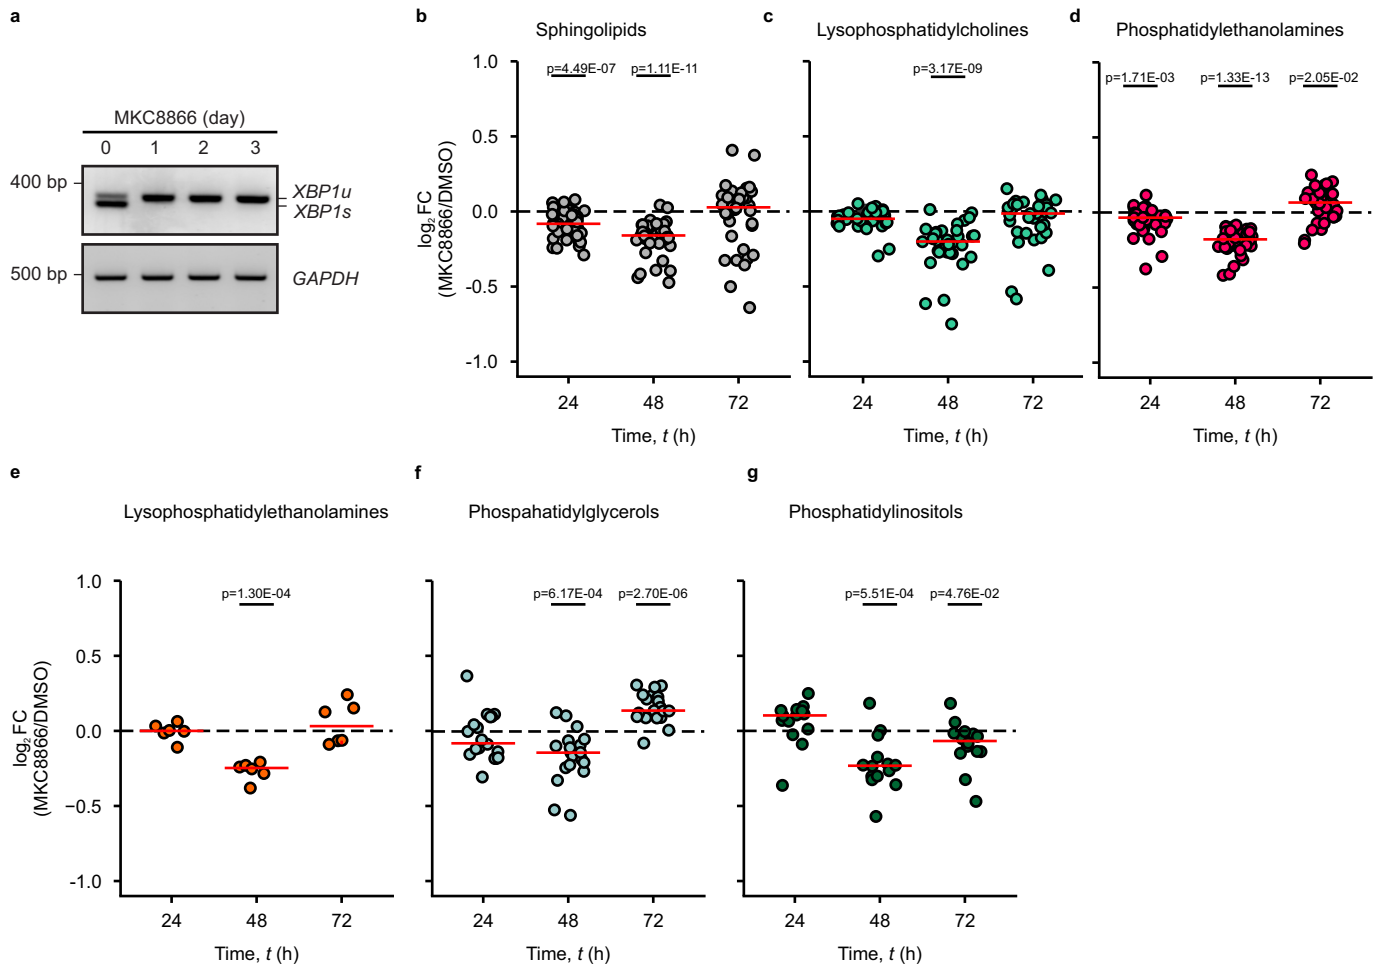

**Supplementary Fig. 1 IRE1 $\alpha$  inhibition alters lipid metabolism in MDA-MB-231 cells.** **a-g** MDA-MB-231 cells were treated with 20  $\mu$ M MKC8866 or vehicle (DMSO) for 24, 48 and 72 h. **a** Representative image of RT-PCR analysis of *XBP1u*, *XBP1s* and *GAPDH* mRNA expression ( $n=3$  biologically independent experiments). Sample processing controls were run on different gels. **b-g** Scatter plots with mean of  $\log_2$  fold changes ( $\log_2 FC$ ) (MKC8866/DMSO) in levels of **b** sphingolipid ( $n=40$ ), **c** lysophosphatidylcholine ( $n=34$ ), **d** phosphatidylethanolamine ( $n=32$ ), **e** lysophosphatidylethanolamine ( $n=6$ ), **f** phosphatidylglycerol ( $n=19$ ), **g** phosphatidylinositol ( $n=14$ ) species over the indicated time points ( $n=5$  biologically independent experiments). Statistical comparisons were performed with unpaired one-sample t-test to determine whether the population mean is different from 0. P values indicated on figures. Source data are provided as a Source Data file.

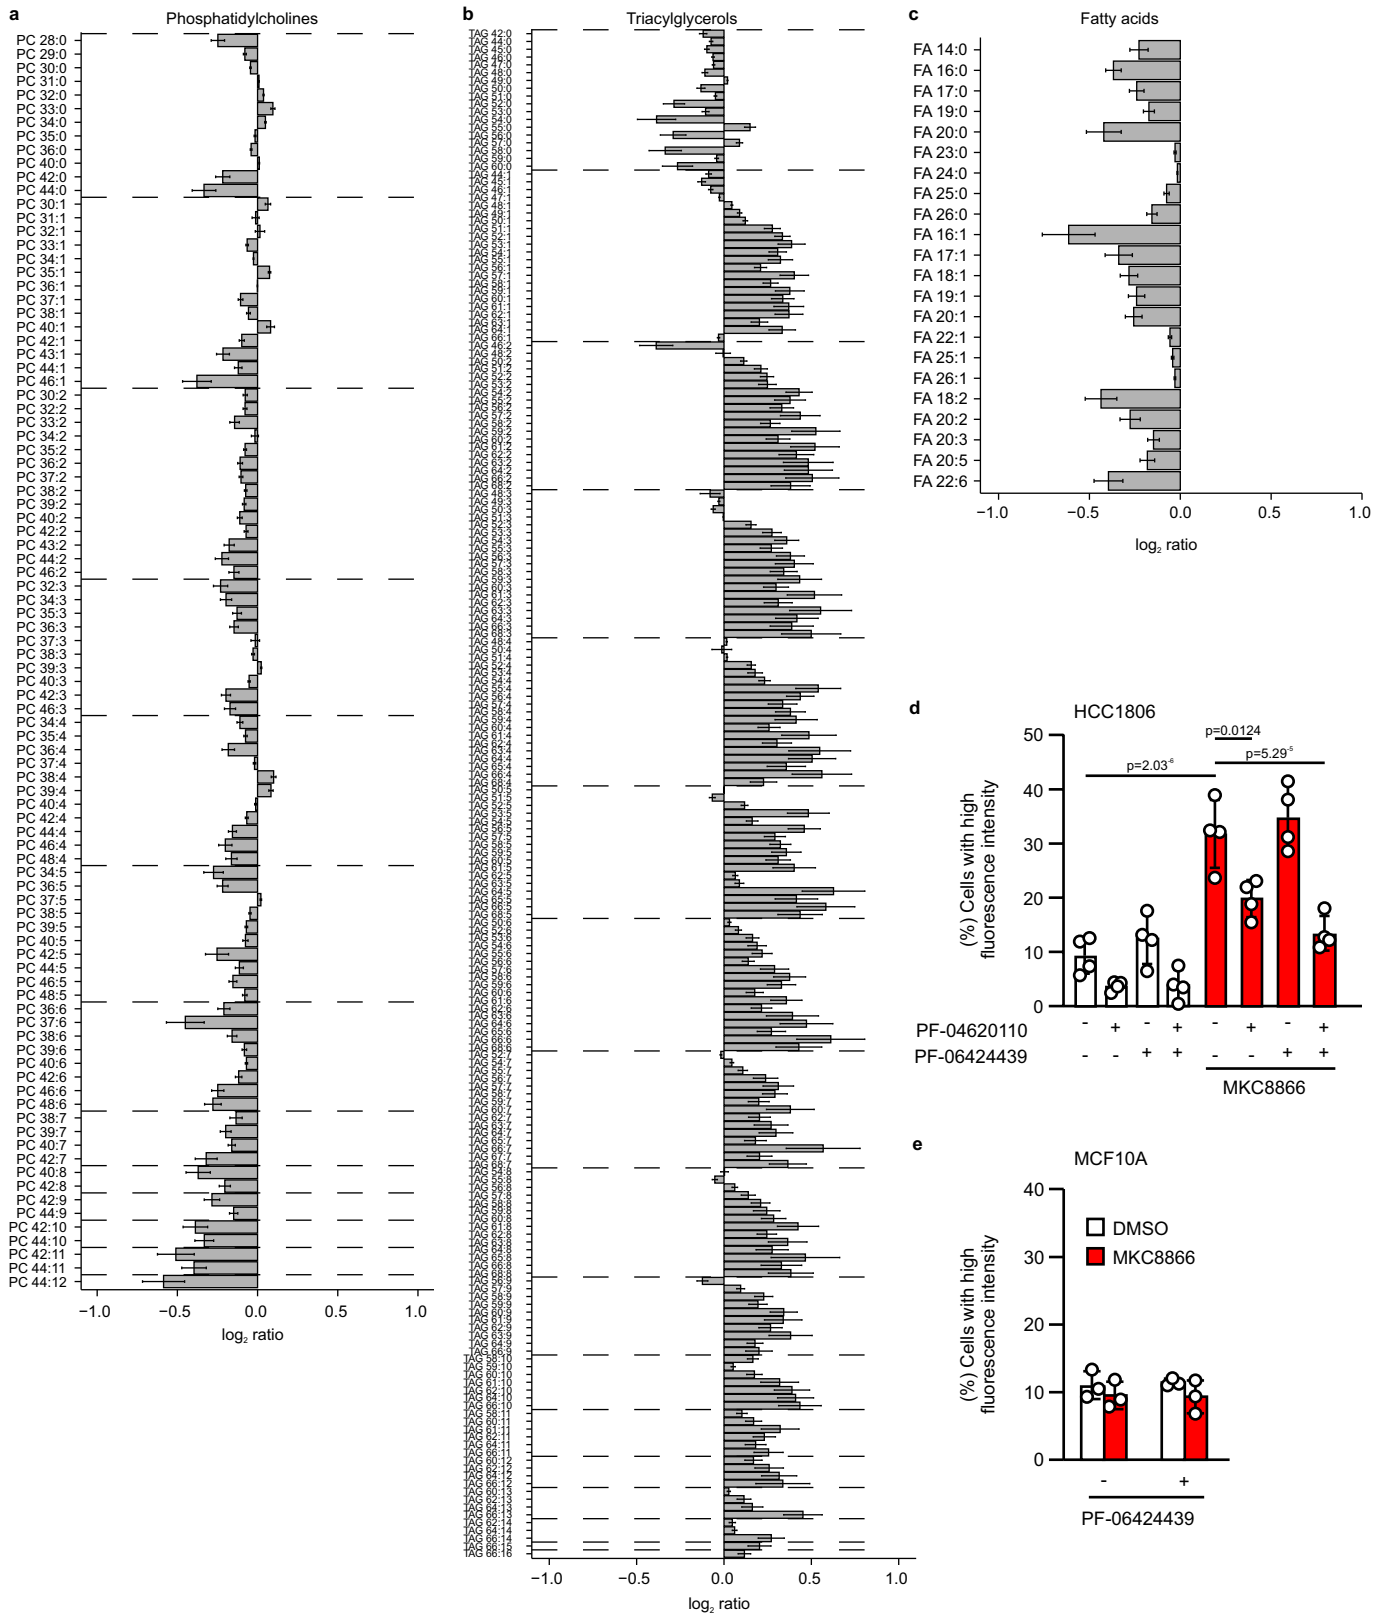

**Supplementary Fig. 2 MKC8866 treatment causes a shift towards the usage of elongated unsaturated lipids.** **a-c** MDA-MB-231 cells were treated with 20  $\mu$ M MKC8866 or vehicle (DMSO) for 24, 48 and 72 h, after which lipids were extracted and their levels were analysed by liquid chromatography tandem mass spectrometry (LC-MS) ( $n=5$  biologically independent experiments). Bar charts showing  $\log_2$  FC (mean of MKC8866 group /mean of DMSO group)  $\pm$  s.e.m. estimated by propagation of error for each individual lipid from the **a** phosphatidylcholine, **b** triacylglycerol and **c** fatty acid lipid groups. For duplicated entries annotated to the same lipid species the mean value was taken. **d** HCC1806 cells ( $n=4$  biologically independent experiments) and **e** MCF10A cells ( $n=3$  biologically independent experiments) were treated with 20  $\mu$ M MKC8866 for 6 days in the presence or absence of 5  $\mu$ M PF-04620110 or 2  $\mu$ M PF-06424439 as indicated and the percentage of cells with high LD content is shown. Indicated  $p$  values based on one-way ANOVA with Bonferroni's multiple comparisons *post hoc* tests. Data are presented as mean values  $\pm$  s.d. Source data are provided as a Source Data file.

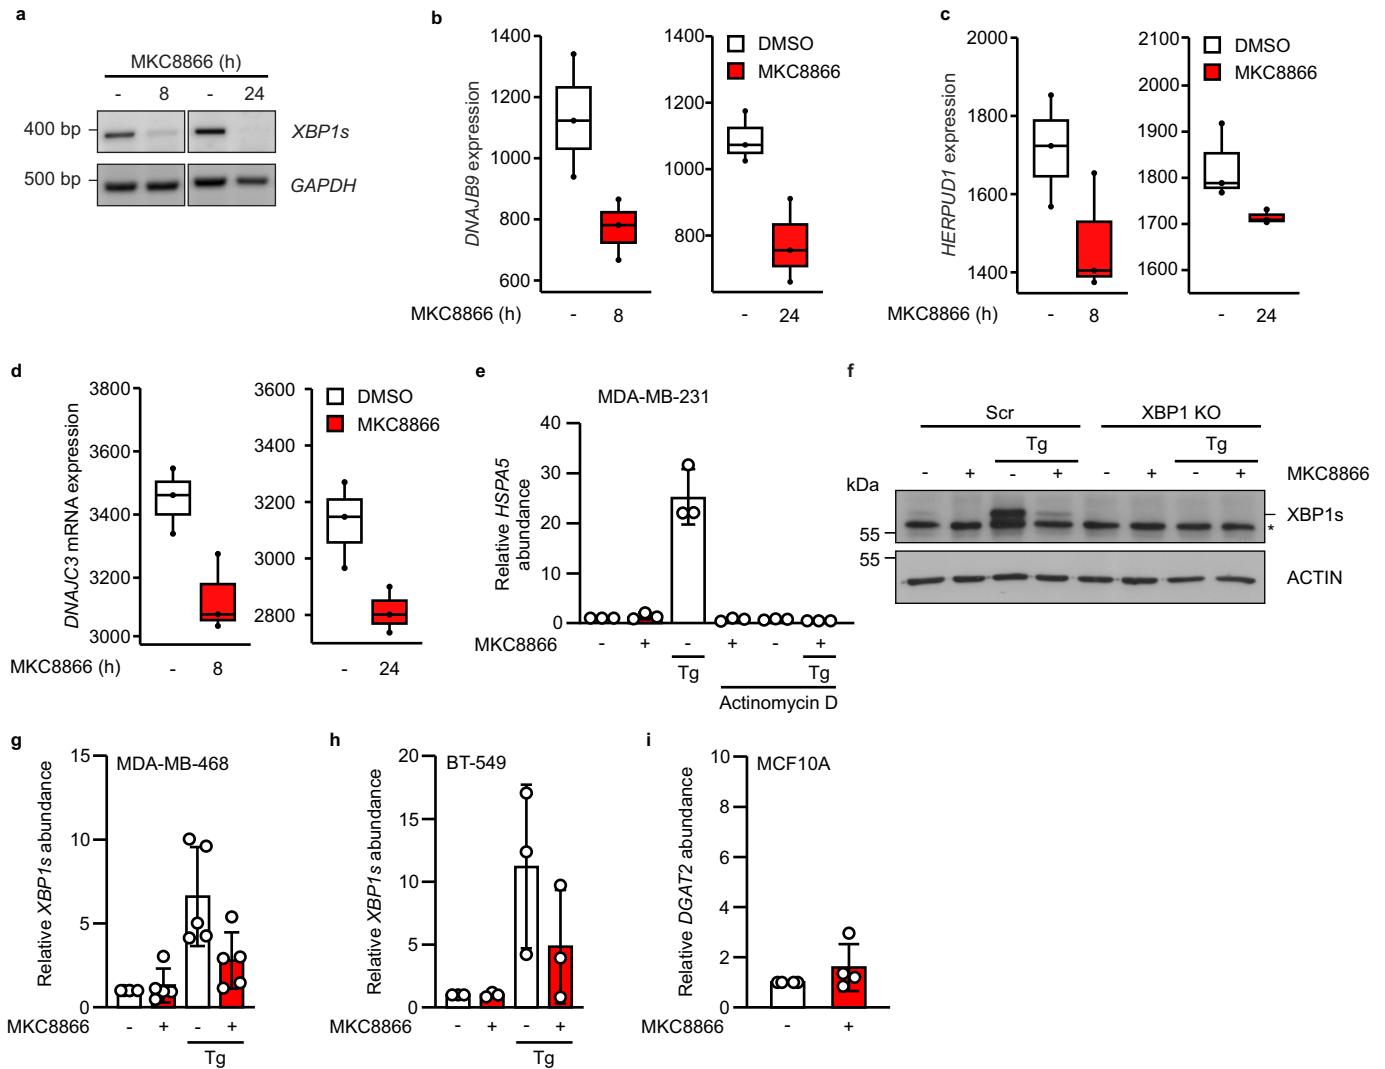

**Supplementary Fig. 3 Regulation of IRE1 $\alpha$  activity alters gene expression in TNBC cells.** **a-d** MDA-MB-231 cells were treated with 20  $\mu$ M MKC8866 for 8 h and 24 h, after which RNA was extracted and RNA sequencing analysis performed (n=3 biologically independent experiments). **a** RT-PCR analysis of *XBP1s* and *GAPDH* mRNA expression. Sample processing controls were run on different gels. **b-d** Expression levels of known *XBP1s*-regulated genes **b** *DNAJB9*, **c** *HERPUD1* and **d** *DNAJC3*. Y axis indicates normalized and batch effect-adjusted RNAseq counts. Boxplots displaying median (middle line), upper and lower quartiles (box), while whiskers stretch to maxima and minima. **e** MDA-MB-231 cells were pre-treated with or without actinomycin D (2  $\mu$ g/ml) for 2 h followed by incubation of cells with Tg (0.25  $\mu$ M) and MKC8866 (20  $\mu$ M) for 8 h (n=3 biologically independent experiments). RT-qPCR analysis of *HSPA5* expression relative to *ACTB* and normalised to control. **f** *XBP1* KO MDA-MB-231 cells and their control counterparts (Scr) were incubated with DMSO or 20  $\mu$ M MKC8866 in the presence or absence of 1  $\mu$ M Tg for 24 h (n=3 biologically independent experiments). Immunoblotting of *XBP1s* and *ACTIN*. \* indicates a non-specific band. **g** MDA-MB-468 (n=5 biologically independent experiments), **h** BT-549 (n=3 biologically independent experiments) and **i** MCF10A cells (n=4 biologically independent experiments) were treated with 20  $\mu$ M MKC8866 and 1  $\mu$ M Tg for 24 h. RT-qPCR analysis of **g-h** *XBP1s* and **i** *DGAT2* expression relative to *MRPL19* (**g** and **h**) or *ACTB* (**i**) and normalised to control. Data are presented as mean values  $\pm$  s.d. Source data are provided as a Source Data file.

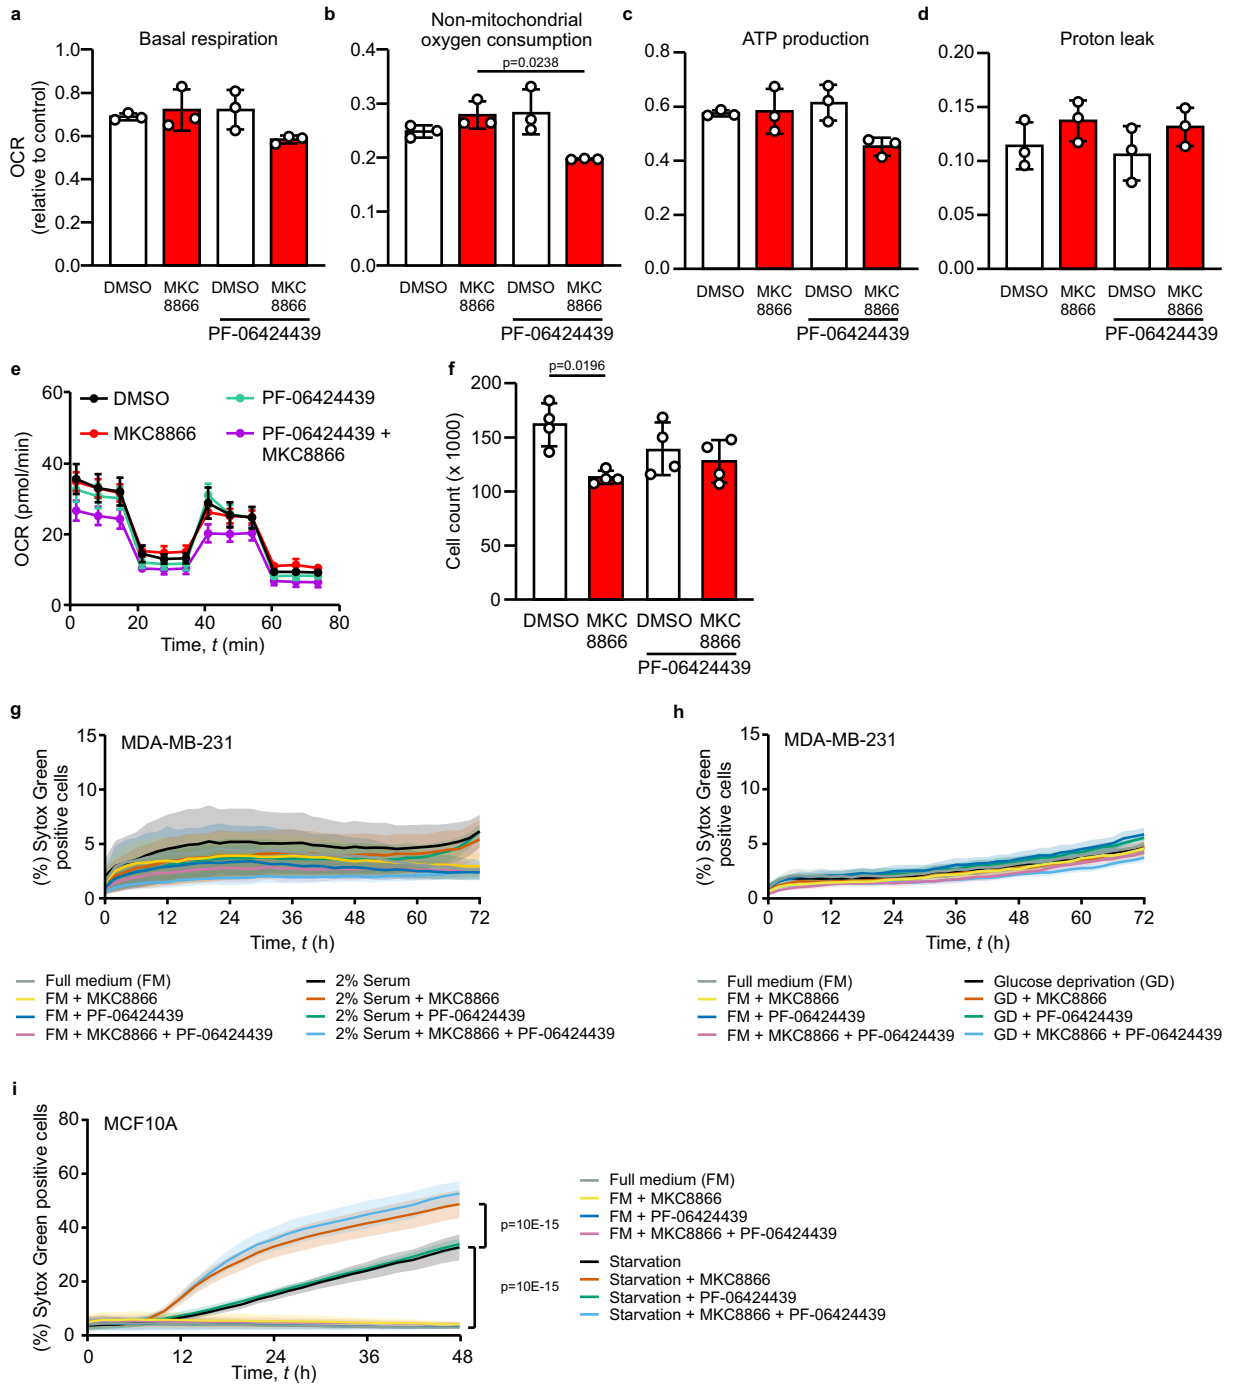

**Supplementary Fig. 4 a-e** Seahorse extracellular flux analysis of **a-d** MDA-MB-231 ( $n=3$  biologically independent experiments) and **e** HCC1806 cells ( $n=3$  biologically independent experiments) treated with vehicle or 20  $\mu\text{M}$  MKC8866 in the presence or absence of 2  $\mu\text{M}$  PF-06424439 for 6 days. **a-d** Normalized data plotted to demonstrate **a** basal respiration, **b** non-mitochondrial oxygen consumption rate, **c** ATP production, **d** proton leak. **e** Data plotted to demonstrate oxygen consumption rate. **f** MDA-MB-231 cells were treated with vehicle or 20  $\mu\text{M}$  MKC8866 in the presence or absence of 2  $\mu\text{M}$  PF-06424439 for 6 days ( $n=4$  biologically independent experiments). Cell proliferation monitored by cell count. Plotted  $p$  values based on one-way ANOVA with Bonferroni's multiple comparisons *post hoc* tests. **g-h** MDA-MB-231 cells or **i** MCF10A cells were treated with vehicle or 20  $\mu\text{M}$  MKC8866 in the presence or absence of 2  $\mu\text{M}$  PF-06424439. After 6 days, culture medium was replaced with a complete medium or **g** medium containing 2% FBS ( $n=4$  biologically independent experiments), **h** medium without glucose ( $n=3$  biologically independent experiments) or **i** Hanks' balanced salt solution ( $n=3$  biologically independent experiments). Kinetics of cell death expressed as the percentage of cells that were Sytox Green positive. Plotted  $p$  values based on two-way ANOVA with Bonferroni's multiple comparisons *post hoc* tests. Values with  $p < 0.05$  are considered statistically significant. Data are presented as mean values **a-d**,  $f \pm \text{s.d.}$  or **e**, **g-i**  $\pm \text{s.e.m.}$  Source data are provided as a Source Data file.

| 8 hours    |                                                                                                 |            |                  |
|------------|-------------------------------------------------------------------------------------------------|------------|------------------|
| Term id    | Term Definition                                                                                 | Enrichment | Corrected pvalue |
| GO:0003241 | growth involved in heart morphogenesis                                                          | 3/5        | 4.00E-04         |
| GO:0045824 | negative regulation of innate immune response                                                   | 8/57       | 1.60E-03         |
| GO:0070245 | positive regulation of thymocyte apoptotic process                                              | 3/6        | 1.70E-03         |
| GO:0010867 | positive regulation of triglyceride biosynthetic process                                        | 4/14       | 1.70E-03         |
| GO:0010875 | positive regulation of cholesterol efflux                                                       | 4/16       | 1.70E-03         |
| GO:0010874 | regulation of cholesterol efflux                                                                | 6/39       | 3.00E-03         |
| GO:0000122 | negative regulation of transcription by RNA polymerase II                                       | 47/831     | 3.10E-03         |
| GO:0045995 | regulation of embryonic development                                                             | 12/132     | 3.20E-03         |
| GO:0051491 | positive regulation of filopodium assembly                                                      | 5/30       | 5.00E-03         |
| GO:0008593 | regulation of Notch signaling pathway                                                           | 10/101     | 5.30E-03         |
| GO:0003211 | cardiac ventricle formation                                                                     | 3/10       | 5.70E-03         |
| GO:0045892 | negative regulation of transcription, DNA-templated                                             | 62/1188    | 7.00E-03         |
| GO:0051128 | regulation of cellular component organization                                                   | 116/2465   | 7.10E-03         |
| GO:1902679 | negative regulation of RNA biosynthetic process                                                 | 64/1243    | 7.20E-03         |
| GO:1903507 | negative regulation of nucleic acid-templated transcription                                     | 64/1241    | 7.30E-03         |
| GO:0032368 | regulation of lipid transport                                                                   | 11/127     | 8.10E-03         |
| GO:0090208 | positive regulation of triglyceride metabolic process                                           | 4/21       | 9.90E-03         |
| GO:0030010 | establishment of cell polarity                                                                  | 10/111     | 1.00E-02         |
| GO:0051253 | negative regulation of RNA metabolic process                                                    | 67/1329    | 1.02E-02         |
| GO:0070830 | bicellular tight junction assembly                                                              | 5/34       | 1.06E-02         |
| GO:0042059 | negative regulation of epidermal growth factor receptor signaling pathway                       | 6/48       | 1.16E-02         |
| GO:0060174 | limb bud formation                                                                              | 3/12       | 1.18E-02         |
| GO:0060547 | negative regulation of necrotic cell death                                                      | 4/24       | 1.18E-02         |
| GO:0051004 | regulation of lipoprotein lipase activity                                                       | 4/23       | 1.26E-02         |
| GO:0006801 | superoxide metabolic process                                                                    | 5/37       | 1.38E-02         |
| GO:0001568 | blood vessel development                                                                        | 29/496     | 1.38E-02         |
| GO:0050777 | negative regulation of immune response                                                          | 12/150     | 1.39E-02         |
| GO:0120034 | positive regulation of plasma membrane bounded cell projection assembly                         | 9/99       | 1.43E-02         |
| GO:1901879 | regulation of protein depolymerization                                                          | 8/83       | 1.48E-02         |
| GO:0045747 | positive regulation of Notch signaling pathway                                                  | 6/52       | 1.55E-02         |
| GO:0010817 | regulation of hormone levels                                                                    | 30/528     | 1.59E-02         |
| GO:0042147 | retrograde transport, endosome to Golgi                                                         | 8/84       | 1.64E-02         |
| GO:0001960 | negative regulation of cytokine-mediated signaling pathway                                      | 7/67       | 1.68E-02         |
| GO:1901185 | negative regulation of ERBB signaling pathway                                                   | 6/53       | 1.73E-02         |
| GO:0007005 | mitochondrion organization                                                                      | 26/442     | 1.78E-02         |
| GO:0016197 | endosomal transport                                                                             | 15/216     | 1.91E-02         |
| GO:0072655 | establishment of protein localization to mitochondrion                                          | 7/72       | 1.98E-02         |
| GO:0048145 | regulation of fibroblast proliferation                                                          | 8/88       | 1.99E-02         |
| GO:0060761 | negative regulation of response to cytokine stimulus                                            | 7/71       | 2.02E-02         |
| GO:0045746 | negative regulation of Notch signaling pathway                                                  | 5/40       | 2.18E-02         |
| GO:1905952 | regulation of lipid localization                                                                | 12/158     | 2.21E-02         |
| GO:0045934 | negative regulation of nucleobase-containing compound metabolic process                         | 69/1427    | 2.21E-02         |
| GO:0001944 | vasculature development                                                                         | 29/517     | 2.29E-02         |
| GO:0050796 | regulation of insulin secretion                                                                 | 13/181     | 2.34E-02         |
| GO:0044058 | regulation of digestive system process                                                          | 5/42       | 2.41E-02         |
| GO:0007219 | Notch signaling pathway                                                                         | 10/128     | 2.44E-02         |
| GO:0001649 | osteoblast differentiation                                                                      | 10/126     | 2.45E-02         |
| GO:0001959 | regulation of cytokine-mediated signaling pathway                                               | 12/167     | 2.54E-02         |
| GO:0051235 | maintenance of location                                                                         | 12/163     | 2.56E-02         |
| GO:0090181 | regulation of cholesterol metabolic process                                                     | 6/59       | 2.67E-02         |
| GO:0034330 | cell junction organization                                                                      | 14/208     | 2.72E-02         |
| GO:0050654 | chondroitin sulfate proteoglycan metabolic process                                              | 5/44       | 2.85E-02         |
| GO:0072358 | cardiovascular system development                                                               | 29/527     | 2.94E-02         |
| GO:0006915 | apoptotic process                                                                               | 46/920     | 2.97E-02         |
| GO:0051489 | regulation of filopodium assembly                                                               | 5/45       | 3.00E-02         |
| GO:0042269 | regulation of natural killer cell mediated cytotoxicity                                         | 5/46       | 3.01E-02         |
| GO:0043433 | negative regulation of DNA-binding transcription factor activity                                | 12/171     | 3.04E-02         |
| GO:0007163 | establishment or maintenance of cell polarity                                                   | 13/189     | 3.08E-02         |
| GO:0042632 | cholesterol homeostasis                                                                         | 8/96       | 3.08E-02         |
| GO:0002716 | negative regulation of natural killer cell mediated immunity                                    | 3/17       | 3.12E-02         |
| GO:0033043 | regulation of organelle organization                                                            | 61/1275    | 3.27E-02         |
| GO:1904035 | regulation of epithelial cell apoptotic process                                                 | 8/95       | 3.30E-02         |
| GO:0045446 | endothelial cell differentiation                                                                | 7/80       | 3.39E-02         |
| GO:0045216 | cell-cell junction organization                                                                 | 10/133     | 3.45E-02         |
| GO:1901880 | negative regulation of protein depolymerization                                                 | 6/62       | 3.58E-02         |
| GO:0006505 | GPI anchor metabolic process                                                                    | 4/32       | 3.59E-02         |
| GO:0120032 | regulation of plasma membrane bounded cell projection assembly                                  | 12/177     | 3.59E-02         |
| GO:0031343 | positive regulation of cell killing                                                             | 6/65       | 3.60E-02         |
| GO:0090276 | regulation of peptide hormone secretion                                                         | 14/214     | 3.62E-02         |
| GO:0006638 | neutral lipid metabolic process                                                                 | 8/98       | 3.64E-02         |
| GO:0043542 | endothelial cell migration                                                                      | 6/64       | 3.65E-02         |
| GO:0060560 | developmental growth involved in morphogenesis                                                  | 9/118      | 3.80E-02         |
| GO:0002715 | regulation of natural killer cell mediated immunity                                             | 5/48       | 3.95E-02         |
| GO:0009612 | response to mechanical stimulus                                                                 | 14/218     | 4.01E-02         |
| GO:0060491 | regulation of cell projection assembly                                                          | 12/179     | 4.05E-02         |
| GO:0031334 | positive regulation of protein complex assembly                                                 | 15/241     | 4.05E-02         |
| GO:0060759 | regulation of response to cytokine stimulus                                                     | 12/178     | 4.07E-02         |
| GO:0019218 | regulation of steroid metabolic process                                                         | 9/121      | 4.13E-02         |
| GO:0035265 | organ growth                                                                                    | 8/103      | 4.20E-02         |
| GO:0045582 | positive regulation of T cell differentiation                                                   | 7/83       | 4.21E-02         |
| GO:0046503 | glycerolipid catabolic process                                                                  | 5/51       | 4.23E-02         |
| GO:0051493 | regulation of cytoskeleton organization                                                         | 28/535     | 4.33E-02         |
| GO:0001667 | ameboid-type cell migration                                                                     | 11/167     | 4.52E-02         |
| GO:0090100 | positive regulation of transmembrane receptor protein serine/threonine kinase signaling pathway | 8/104      | 4.58E-02         |
| GO:0015914 | phospholipid transport                                                                          | 7/87       | 4.63E-02         |
| GO:0070125 | mitochondrial translational elongation                                                          | 7/88       | 4.64E-02         |
| GO:0043062 | extracellular structure organization                                                            | 21/380     | 4.76E-02         |
| GO:0009749 | response to glucose                                                                             | 10/146     | 4.79E-02         |
| GO:0009967 | positive regulation of signal transduction                                                      | 76/1678    | 4.80E-02         |
| GO:0043242 | negative regulation of protein complex disassembly                                              | 6/69       | 4.81E-02         |
| GO:0034329 | cell junction assembly                                                                          | 11/163     | 4.86E-02         |
| GO:0031146 | SCF-dependent proteasomal ubiquitin-dependent protein catabolic process                         | 7/90       | 4.94E-02         |
| GO:1903509 | liposaccharide metabolic process                                                                | 8/108      | 4.96E-02         |

| 24 hours   |                                                                                    |            |                  |
|------------|------------------------------------------------------------------------------------|------------|------------------|
| Term id    | Term Definition                                                                    | Enrichment | Corrected pvalue |
| GO:1902512 | positive regulation of apoptotic DNA fragmentation                                 | 2/4        | 2.00E-04         |
| GO:0015813 | L-glutamate transmembrane transport                                                | 3/19       | 1.70E-03         |
| GO:1903626 | positive regulation of DNA catabolic process                                       | 2/5        | 2.70E-03         |
| GO:0009220 | pyrimidine ribonucleotide biosynthetic process                                     | 3/22       | 2.70E-03         |
| GO:0002476 | antigen processing and presentation of endogenous peptide antigen via MHC class II | 2/7        | 4.20E-03         |
| GO:0009218 | pyrimidine ribonucleotide metabolic process                                        | 3/24       | 4.50E-03         |
| GO:0030148 | sphingolipid biosynthetic process                                                  | 5/90       | 4.90E-03         |
| GO:0006220 | pyrimidine nucleotide metabolic process                                            | 4/62       | 5.60E-03         |
| GO:0019933 | cAMP-mediated signaling                                                            | 6/147      | 6.40E-03         |
| GO:0060536 | cartilage morphogenesis                                                            | 3/29       | 6.60E-03         |
| GO:0034308 | primary alcohol metabolic process                                                  | 4/72       | 7.10E-03         |
| GO:0034381 | plasma lipoprotein particle clearance                                              | 3/40       | 7.30E-03         |
| GO:0046520 | sphingoid biosynthetic process                                                     | 2/12       | 7.80E-03         |
| GO:0019935 | cyclic-nucleotide-mediated signaling                                               | 6/170      | 9.60E-03         |
| GO:0007568 | aging                                                                              | 8/282      | 1.03E-02         |
| GO:0003333 | amino acid transmembrane transport                                                 | 4/77       | 1.10E-02         |
| GO:0006805 | xenobiotic metabolic process                                                       | 5/122      | 1.14E-02         |
| GO:1902475 | L-alpha-amino acid transmembrane transport                                         | 161/32     | 1.22E-02         |
| GO:0006766 | vitamin metabolic process                                                          | 5/123      | 1.24E-02         |
| GO:0071466 | cellular response to xenobiotic stimulus                                           | 6/181      | 1.52E-02         |
| GO:0017144 | drug metabolic process                                                             | 11/487     | 1.52E-02         |
| GO:0015800 | acidic amino acid transport                                                        | 3/47       | 1.56E-02         |
| GO:0046467 | membrane lipid biosynthetic process                                                | 5/130      | 1.69E-02         |
| GO:0002716 | negative regulation of natural killer cell mediated immunity                       | 2/17       | 1.79E-02         |
| GO:0070542 | response to fatty acid                                                             | 4/91       | 1.85E-02         |
| GO:0002715 | regulation of natural killer cell mediated immunity                                | 3/48       | 1.93E-02         |
| GO:0006643 | membrane lipid metabolic process                                                   | 6/199      | 1.99E-02         |
| GO:0042445 | hormone metabolic process                                                          | 6/196      | 2.03E-02         |
| GO:0001912 | positive regulation of leukocyte mediated cytotoxicity                             | 3/55       | 2.19E-02         |
| GO:0006979 | response to oxidative stress                                                       | 9/389      | 2.22E-02         |
| GO:0006665 | sphingolipid metabolic process                                                     | 5/151      | 2.25E-02         |
| GO:0006548 | negative regulation of cell death                                                  | 18/1037    | 2.39E-02         |
| GO:1903076 | regulation of protein localization to plasma membrane                              | 4/99       | 2.40E-02         |
| GO:0015807 | L-lysine acid transport                                                            | 3/57       | 2.52E-02         |
| GO:0072527 | pyrimidine-containing compound metabolic process                                   | 4/100      | 2.60E-02         |
| GO:0030154 | cell differentiation                                                               | 50/3683    | 2.65E-02         |
| GO:1903078 | positive regulation of protein localization to plasma membrane                     | 3/58       | 2.73E-02         |
| GO:0019932 | second-messenger-mediated signaling                                                | 8/335      | 2.78E-02         |
| GO:0046939 | nucleotide phosphorylation                                                         | 3/61       | 2.89E-02         |
| GO:0007584 | response to nutrient                                                               | 6/221      | 2.90E-02         |
| GO:0048869 | cellular developmental process                                                     | 50/3776    | 2.91E-02         |
| GO:0001676 | long-chain fatty acid metabolic process                                            | 4/108      | 3.01E-02         |
| GO:0019751 | polyol metabolic process                                                           | 4/110      | 3.13E-02         |
| GO:0048638 | regulation of developmental growth                                                 | 8/351      | 3.16E-02         |
| GO:0009410 | response to xenobiotic stimulus                                                    | 7/295      | 3.20E-02         |
| GO:0010941 | regulation of cell death                                                           | 28/1749    | 3.35E-02         |
| GO:0007127 | meiosis I                                                                          | 4/109      | 3.38E-02         |
| GO:0044331 | cell-cell adhesion mediated by cadherin                                            | 2/27       | 3.43E-02         |
| GO:1904375 | regulation of protein localization to cell periphery                               | 4/117      | 3.50E-02         |
| GO:0006865 | amino acid transport                                                               | 4/119      | 3.62E-02         |
| GO:0006836 | neurotransmitter transport                                                         | 5/178      | 3.67E-02         |
| GO:0009636 | response to toxic substance                                                        | 10/510     | 3.76E-02         |
| GO:0034599 | cellular response to oxidative stress                                              | 6/239      | 3.87E-02         |
| GO:0010469 | regulation of signaling receptor activity                                          | 11/600     | 3.89E-02         |
| GO:1901657 | glycosyl compound metabolic process                                                | 4/130      | 4.04E-02         |
| GO:0007189 | adenylate cyclase-activating G protein-coupled receptor signaling pathway          | 4/128      | 4.14E-02         |
| GO:1901615 | organic hydroxy compound metabolic process                                         | 9/444      | 4.21E-02         |
| GO:0006066 | alcohol metabolic process                                                          | 7/304      | 4.23E-02         |
| GO:0046677 | response to antibiotic                                                             | 7/317      | 4.23E-02         |
| GO:1901135 | carbohydrate derivative metabolic process                                          | 16/986     | 4.26E-02         |
| GO:0001910 | regulation of leukocyte mediated cytotoxicity                                      | 3/77       | 4.39E-02         |
| GO:0098656 | anion transmembrane transport                                                      | 6/252      | 4.46E-02         |
| GO:0034332 | adherens junction organization                                                     | 3/83       | 4.57E-02         |
| GO:0070588 | calcium ion transmembrane transport                                                | 5/199      | 4.65E-02         |
| GO:0090150 | establishment of protein localization to membrane                                  | 6/262      | 4.67E-02         |
| GO:0008219 | cell death                                                                         | 17/1085    | 4.72E-02         |
| GO:0071248 | cellular response to metal ion                                                     | 5/192      | 4.74E-02         |

Supplementary Table 1 Functional analysis of the significantly changing genes followed by MKC8866 treatment for 8 and 24 h.

| <b>Transcript</b>        |     | <b>Sequence (5' – 3')</b> |
|--------------------------|-----|---------------------------|
| <b><i>Total XBP1</i></b> | FWD | GGAACAGCAAGTGGTAGA        |
|                          | REV | CTGGAGGGGTGACAACTG        |
| <b><i>XBP1s</i></b>      | FWD | TCTGCTGAGTCCGCAGCAGG      |
|                          | REV | CTCTAAGACTAGAGGCTTGG      |
| <b><i>XBP1u</i></b>      | FWD | CAGACTACGTGCGCCTCTGC      |
|                          | REV | CTTCTGGGTAGACTTCTGGG      |
| <b><i>GAPDH</i></b>      | FWD | ACCACAGTCCATGCCATC        |
|                          | REV | TCCACCACCCTGTTGCTG        |

**Supplementary Table 2** PCR primer sequences

| <b>Transcript</b>    |       | <b>Sequence (5'– 3')</b>    |
|----------------------|-------|-----------------------------|
| <b><i>MRPL19</i></b> | FWD   | CTTAGGAATGTTATCGAAGGACAAG   |
|                      | REV   | GCTATATTCAGGAAGGGCATCT      |
|                      | PROBE | CTCGGGTCCAGGAGAGATTCAGGTG   |
| <b><i>ACTB</i></b>   | FWD   | ACAGAGCCTCGCCTTTG           |
|                      | REV   | CCTTGACATGCCGGAG            |
|                      | PROBE | TCATCCATGGTGAGCTGGCGG       |
| <b><i>DGAT2</i></b>  | FWD   | GGCTGGTGTGTTGACTGGAA        |
|                      | REV   | TCAGCAGGTTGTGTGTCTTC        |
|                      | PROBE | CCAAGAAAGGTGGCAGGAGGTCA     |
| <b><i>HSPA5</i></b>  | FWD   | CCAGTCAGATCAAATGTACCCA      |
|                      | REV   | GTGCCTACCAAGAAGTCTCAG       |
|                      | PROBE | TTGTCTTTTGTGAGGGGTCTTTCACCT |

**Supplementary Table 3** RT-qPCR primer sequences
