# Supplementary material for: Regulated IRE1α-dependent decay (RIDD)-mediated reprograming of lipid metabolism in cancer
Source: PubMed Central journal article supplement (PMC9076827; doi:10.1038/s41467-022-30159-0), 2022-05-06
Supplement: 41467_2022_30159_MOESM2_ESM.pdf [file 41467_2022_30159_MOESM2_ESM.pdf]

## **Description of Additional Supplementary Files**

File Name: Supplementary Data 1

Description: Tables containing sample information and measurements for the mass spectrometry based metabolomic profiling experiment underlying figure 1

File Name: Supplementary Data 2

Description: Tables containing sample information and measurements for the mass spectrometry based metabolomic profiling experiment underlying figure 4
